# 1                    **Robotic middle ear access for cochlear implantation: first in man**

2                    Marco Caversaccio<sup>1,2</sup>, Wilhelm Wimmer<sup>\*,1,2</sup>, Juan Anso<sup>3</sup>, Georgios Mantokoudis<sup>1</sup>, Nicolas Gerber<sup>3</sup>,  
3                    Christoph Rathgeb<sup>2</sup>, Daniel Schneider<sup>3</sup>, Jan Hermann<sup>3</sup>, Franca Wagner<sup>4</sup>, Olivier Scheidegger<sup>5</sup>, Markus  
4                    Huth<sup>1</sup>, Lukas Anschuetz<sup>1</sup>, Martin Kompis<sup>1</sup>, Tom Williamson<sup>3</sup>, Brett Bell<sup>3</sup>, Kate Gavaghan<sup>3</sup>, Stefan Weber<sup>3</sup>

5  
6                    <sup>1</sup>Department of Otorhinolaryngology, Head and Neck Surgery, Inselspital, Bern University Hospital,  
7                    University of Bern, Bern, Switzerland

8                    <sup>2</sup>Hearing Research Laboratory, ARTORG Center for Biomedical Engineering Research, University of  
9                    Bern, Bern, Switzerland

10                    <sup>3</sup>Image-Guided Therapy, ARTORG Center for Biomedical Engineering Research, University of Bern,  
11                    Bern, Switzerland

12                    <sup>4</sup>Department of Diagnostic and Interventional Neuroradiology, Inselspital, Bern University Hospital,  
13                    University of Bern, Bern, Switzerland

14                    <sup>5</sup>Department of Neurology, Inselspital, Bern University Hospital, University of Bern, Bern, Switzerland

15

## 16                    **Corresponding author:**

17                    Wilhelm Wimmer, PhD

18                    Hearing Research Laboratory, ARTORG Center for Biomedical Engineering Research, Murtenstrasse 50,  
19                    University of Bern, Bern, Switzerland

20                    Email: [wilhelm.wimmer@artorg.unibe.ch](mailto:wilhelm.wimmer@artorg.unibe.ch); Phone: 0041 31 632 8789

21

22                    **Short title:** First in Man Robotic Cochlear Implantation

23

24

## ABSTRACT

25  
26  
27  
28  
29  
30  
31  
32  
33  
34  
35  
36  
37  
38  
39  
40

To demonstrate the feasibility of robotic middle ear access in a clinical setting, nine adult patients with severe-to-profound hearing loss indicated for cochlear implantation were included in this clinical trial. A keyhole access tunnel to the tympanic cavity and targeting the round window was planned based on preoperatively acquired computed tomography image data and robotically drilled to the level of the facial recess. Intraoperative imaging was performed to confirm sufficient distance of the drilling trajectory to relevant anatomy. Robotic drilling continued toward the round window. The cochlear access was manually created by the surgeon. Electrode arrays were inserted through the keyhole tunnel under microscopic supervision via a tympanomeatal flap. All patients were successfully implanted with a cochlear implant. In 9 of 9 patients the robotic drilling was planned and performed to the level of the facial recess. In 3 patients, the procedure was reverted to a conventional approach for safety reasons. No change in facial nerve function compared to baseline measurements was observed. Robotic keyhole access for cochlear implantation is feasible. Further improvements to workflow complexity, duration of surgery, and usability including safety assessments are required to enable wider adoption of the procedure.

## INTRODUCTION

41

42

43 Advances in image guidance, robotic technology and minimally-invasive techniques offer an opportunity to  
44 transform inner ear surgery from open procedures to keyhole approaches. Over four decades after the  
45 description by House [1], conventional cochlear implant (CI) surgery remains essentially unchanged. The  
46 success story of CIs with about 600.000 implant users worldwide, shows the procedure is widely considered  
47 safe and effective [2-4]. Nevertheless, alternative implantation techniques to further improve patient  
48 outcomes such as reduced mastoidectomy under endoscopic supervision [5] and endaural implantation  
49 techniques have been proposed (e.g., the pericanal, suprameatal, or Veria approaches) [6-8]. However,  
50 mastoidectomy followed by a posterior tympanotomy remains the standard surgical approach to the inner  
51 ear for cochlear implantation.

52

53 Keyhole access CI surgery has become an active area of change for the procedure, with a view that image-  
54 guided, minimally-invasive and robotic equipment could be the starting point for a dedicated robotic CI  
55 procedure that could facilitate standardization of CI surgery and potentially impact hearing outcomes.  
56 Labadie et. al investigated a stereotactic frame-based keyhole intervention in eight CI patients [9]. Our group  
57 has developed the concept of robotic cochlear implantation (RCI) including elements of image-based  
58 procedural planning, robotic middle and inner ear access and finally robotic CI insertion, which aims to  
59 enable optimization and standardization of care. Following on from the first-in-man procedure [10], a  
60 clinical trial was carried out to test the hypothesis that a robotic and task-autonomous drill protocol can be  
61 applied to return the required geometric accuracy to enable a keyhole approach for cochlea implantation on  
62 varying anatomy. More specifically, elements such as the i) pre-operative planning process, the ii) multi-  
63 layer safety architecture and iii) tunnel based electrode insertion were clinically evaluated. Here we present  
64 the concluding report on the robotic middle ear access procedure carried out on a clinical pilot population  
65 of nine patients.

66

## METHODS

### 67 Study Design

68 We performed a non-randomized single-center first-in-man trial to evaluate the clinical feasibility of RCI  
69 (Figure 1). The study protocol was approved by the local institutional review board (Ethics Commission of  
70 Bern, KEK-BE PB\_2017-00312) and regulatory body (Swissmedic, Nr. 2013-MD-0042, EUDAMED CIV-  
71 13-12-011779) and registered (clinicaltrials.gov identifier: NCT02641795, trial registration on December  
72 29<sup>th</sup>, 2015). Recruitment took place between 01.07.2016 and 22.08.2018 and surgeries took place between  
73 14.07.2016 and 15.02.2018. All study procedures were performed at a tertiary referral hospital (Inselspital,  
74 Bern) in accordance with relevant guidelines and regulations. CI candidacy was evaluated according to a  
75 routine patient work-up, including medical, neuroradiological, and audiological assessment. Study-specific  
76 procedures consisted of screening, facial nerve function baseline testing at one day before surgery, the  
77 robotic intervention, computed tomography (CT) imaging one day after surgery, and follow-up testing 10  
78 to 14 days after surgery. Clinical outcomes were assessed at 1 day, 2 weeks and 1 month after surgery.  
79 Safety of the trial was monitored by a board of three independent external reviewers.

80

81 **Figure 1.** Flowchart for non-randomized trial design.

82

### 83 Study Participants

84 Forty-three subjects were screened in our department as part of the CI candidacy assessment routine. Besides  
85 general accordance with conventional eligibility for CI surgery, subjects had to be 18 years or older, fluent  
86 in German or French, have a sufficient facial recess size (i.e., at least 2.5 mm, allowing for 0.4 mm safety  
87 margin to the facial nerve and 0.3 mm to the chorda tympani using a 1.8 mm drill bit). Exclusion criteria  
88 were: pregnancy, anatomical malformations of the middle or inner ear or abnormal course of the facial  
89 nerve. Existing preoperative CT datasets of the temporal bone were used to assess anatomical conditions  
90 and facial recess size [10]. In total, nine subjects gave written informed consent and were subsequently  
91 enrolled in the study (Table 1).

92

93 **Table 1.** Study participant details.

94

| <b>ID</b> | <b>Age, years</b> | <b>Gender</b> | <b>Side</b> | <b>Unaided PTA, dB HL</b> | <b>Etiology</b>          | <b>Hearing loss duration, years</b> | <b>Electrode array</b> |
|-----------|-------------------|---------------|-------------|---------------------------|--------------------------|-------------------------------------|------------------------|
| 01        | 51                | female        | right       | 120                       | Cogan syndrome           | 26                                  | Flex <sup>24</sup>     |
| 02        | 49                | male          | right       | 94                        | Morbus Menière           | 22                                  | Flex <sup>28</sup>     |
| 03*       | 39                | female        | left        | 106                       | Progressive hearing loss | 10                                  | Flex <sup>28</sup>     |
| 04        | 68                | female        | right       | 71                        | Progressive hearing loss | 12                                  | Flex <sup>28,CMD</sup> |
| 05        | 71                | female        | right       | 88                        | Sudden deafness          | 5                                   | Flex <sup>28</sup>     |
| 06*       | 59                | female        | left        | 89                        | Progressive hearing loss | 7                                   | Flex <sup>28,CMD</sup> |
| 07        | 60                | male          | right       | 90                        | Progressive hearing loss | 13                                  | Flex <sup>24</sup>     |
| 08        | 73                | female        | left        | 86                        | Morbus Menière           | 26                                  | Flex <sup>28</sup>     |
| 09        | 61                | male          | right       | 108                       | Congenital               | 20                                  | Flex <sup>28</sup>     |

\*existing cochlear implant in contralateral ear.

PTA = pure tone average over 0.5/1/2/4 kHz; CMD = custom made device with shorter electrode lead.

95

96

## 97 **Baseline Testing**

98 The motor portion of the facial nerve was evaluated using the standard Sunnybrook composite score [11];  
99 and facial nerve conduction studies. The facial nerve was stimulated supramaximal at the mandibular angle,  
100 and amplitude and latency of the compound muscle action potentials were recorded using surface electrodes  
101 from the frontal, nasal, and mental muscles [12].

## 103 **Patient Preparation and intervention planning**

104 The complete intervention was performed under general anesthesia. A 5 cm long retroauricular incision was  
105 created. A physical template was used to mark and insert four bone fiducial screws serving as artificial  
106 landmarks for patient-to-plan registration [13]. Patients were then transferred for preoperative CT imaging  
107 (Somatom CT, Siemens, Germany; voxel size:  $0.156 \times 0.156 \times 0.2 \text{ mm}^3$ ; 120 kVp) in the neuroradiological  
108 department to confirm correct insertion of the four implanted screws. Using a specific planning software  
109 [14], the team of the responsible surgeon, neuroradiologist and a trained computer engineer conducted next  
110 the procedural planning. First, the bony part of the external auditory canal, the facial nerve, the chorda  
111 tympani and the ossicles were annotated in the image data. Next, the access trajectory through the facial  
112 recess (diameter 1.8 mm distal and 2.5 mm proximal) from the mastoid surface to the center of the round  
113 window membrane, providing for an optimal insertion angle [15], was identified and defined in the image  
114 data. Meanwhile, the patient was transferred back to the operating room and prepared for the procedure [10].  
115 The patient head was non-invasively constrained using a task specific headrest. Two sets of paired needle  
116 electrodes were inserted into the periorbital and perioral muscles to provide for facial nerve monitoring. To  
117 compensate for respiratory motion, the patients head was tracked via a skull attached dynamic reference  
118 base, aligned with the systems tracking camera [16].

## 120 **Robotic Middle Ear Access**

121 Upon patient-to-image registration, a task specific robotic system [17,16] was used to drill the access tunnel  
122 (Figure 2) in 3 phases: (i) drilling from the surface of the mastoid bone until 3 mm before the facial nerve,  
123 (ii) passing through the facial recess, and (iii) completing the access to the middle ear cavity. Robotic drilling  
124 was performed in steps (with complete extraction of the drill bit between steps to allow for cooling and  
125 cleaning) with a feed forward rate of 0.5 mm per second and with 1000 revolutions per minute. Drilling

126 increments of 0.5 mm and 2 mm were used for the passage of the facial recess and during the less critical  
127 phases drill phases i) and iii) respectively.

128

129 **Figure 2.** (left) The robotic system with patient. (right) Comparison between conventional and robotic  
130 procedure in postoperative computed-tomography slices (subject 06).

131

### 132 **Intraoperative imaging**

133 Upon reaching the level of the facial nerve, the robot was moved away from the operating table and a  
134 titanium rod was inserted into the drilled tunnel. At that point the temporal bone region was repeated imaged  
135 with a low-dose radiation, cone-based CT scanner for use in operating rooms (xCAT, Xoran, Ann Arbor,  
136 USA; voxel resolution:  $0.3 \times 0.3 \times 0.3 \text{ mm}^3$ , 120 kVp, 6 mA; Figure 3 left). The acquired image data were  
137 used to measure the distances of the drill tunnel to surrounding anatomical structures by using an automatic  
138 detection algorithm [18]. A safe trajectory was also confirmed manually on the image data by a present  
139 neuroradiologist. The distance of the drill tunnel to relevant anatomy was also assessed by the systems  
140 integrated force-density pose estimation calculation [16,19]. Subsequently, the responsible surgeon decided  
141 whether the robotic procedure would continue (i.e., phase ii) or be reverted to a conventional approach.

142

### 143 **Electromyography for facial nerve monitoring**

144 Integrity of the facial nerve was monitored continuously through i) measuring potential electromyography  
145 (EMG) discharges elicited by mechanical irritation of the facial nerve during the complete drilling and ii)  
146 analyzing compound muscle action potentials from multipolar stimulation specifically when passing the  
147 facial nerve [12,20].

148

### 149 **Implantation**

150 After completion of the access tunnel, the landmark screws and the dynamic reference base were removed.  
151 The tunnel was cleaned using irrigation and suction. Tunnel alignment with the round window was inspected  
152 with a sialendoscope (Karl Storz, Tuttlingen, Germany). The retroauricular incision was extended inferiorly  
153 and a tympanomeatal flap was created as an auxiliary access to the tympanic cavity [21]. The round window  
154 niche was microscopically visualized through the external auditory canal. Through the tympanomeatal flap,  
155 the bony overhang of the round window was removed using a skeeter drill (Bien-Air, Biel, Switzerland).

156 Next, the implant bed was prepared. As opposed to conventional CI surgery, the excess lead of the implant  
157 cannot be accommodated within the mastoidectomy with the minimally invasive approach. Therefore, a  
158 superficial well (2 mm in depth) was milled into the cortex of the bone to enable safe embedding. This step  
159 was not required to the same extent with the custom-made device implants featuring shortened leads  
160 (subjects 04 and 06). The middle ear cavity and the implant bed were cleaned to avoid intrusion of bone  
161 dust and blood into the cochlea during electrode array insertion. The round window membrane was opened  
162 with a micro-needle. If required, a custom-made insertion guide tube, was placed inside the tunnel to assist  
163 insertion [22] and provide against unwanted contamination of the electrode with blood. Sodium hyaluronate  
164 was applied as lubricant (ProVisc®, Alcon, Rotkreuz, Switzerland). The electrode array was slowly inserted  
165 until the first point of resistance. After insertion, the guide tube was removed and the round window niche  
166 was sealed with fatty tissue. The excess lead was fixed at the top of the tunnel using bone wax (Ethicon,  
167 Somerville, US). Following implant telemetry, the wound was closed. Implant body management was  
168 adapted from the conventional CI procedure.

169

## 170 **Outcome measures**

171 Drilling accuracy (primary outcome) was measured in available intraoperative CB-CT scans at the level of  
172 the facial recess as the absolute centerline displacement of the planned versus the drilled tunnel. The number  
173 of fully completed robotic accesses to the tympanic cavity, the total procedural durations and durations of  
174 all sub-procedures were recorded. Postoperative high-resolution CT scans of the temporal bone were used  
175 to measure the angular insertion depth (in degrees) and the implanted scala (secondary outcomes). The  
176 surgical follow up included assessment of pain (visual analog scale) and any potential clinical complications.  
177 Functional preservation of the facial nerve was postoperatively assessed relative to the preoperative baseline  
178 measurements. Structural preservation of the chorda tympani was confirmed by a neuroradiologist in the  
179 standard postoperative high-resolution CT scan of the temporal bone with similar scanning parameters to  
180 the preoperative CT. Audiological fitting was performed according to our standard routine, i.e., activation  
181 and initial fitting at 1 month and consecutive fitting sessions at up to 12 months after the surgery.  
182 Audiological evaluation included the number of activated channels, aided sound field thresholds (pure tone  
183 average over 0.5/1/2/4 kHz, in dB HL), aided word recognition scores (in %) for monosyllables (at 65 dB  
184 SPL) and numbers (at 70 dB SPL). If applicable, the degree of hearing preservation (in %) was quantified  
185 [23].



186

187

## RESULTS

### 188 Feasibility

189 Of 43 initially assessed subjects planned for cochlear implantation, 29 patients were screened for facial  
190 recess size, the other 14 patients were excluded because one or more of the other inclusion criteria were  
191 unmet. Eighteen of the 29 patients had a sufficient facial recess size and were eligible for the study. Of  
192 those, nine patients consented to participation in the trial. In all nine patients, a safe access tunnel to the  
193 level of the facial recess was planned and drilled. The complete robotic procedure including drilling through  
194 the facial recess was performed in 6 of 9 patients. Insufficient distances to the facial nerve ( $< 0.3$  mm) and  
195 the tympanic membrane ( $< 0.1$  mm) were detected in the available intraoperative image data in patients 8  
196 and 9 respectively. Hence, procedures were reverted to a conventional transmastoid posterior tympanotomy.  
197 In subject 2, the patient's mastoid region could not be imaged due to workspace limitations and a compressed  
198 cervical spine region. Hence, as intraoperative image data was required for confirmation of sufficient tool  
199 clearance by study design, this case was also reverted to the standard procedure. In all 3 reverted cases  
200 clearance of the drill trajectory to the facial nerve was confirmed microscopically during mastoidectomy  
201 (Figure 3 right). Drilling accuracy, measured as the deviation between the planned and the drilled tunnel at  
202 the level of the facial recess, was  $0.21 \text{ mm} \pm 0.09 \text{ mm}$  (Table 2) which is in-line with preclinical validation  
203 [17]. All nine patients were implanted with a CI (SYNCHRONY, MED-EL, Innsbruck, Austria) under full  
204 preservation of facial nerve function. No abnormal EMG activity or low stimulation thresholds were  
205 identified during the entire robotic drilling phases. Implanted subjects neither showed a change in  
206 Sunnybrook composite score nor in facial nerve conduction study parameters compared to baseline  
207 measurements. In all cases, preservation of the chorda tympani was confirmed in the postoperative image  
208 evaluation. Overall, procedural blood loss was less than 50 ml loss in eight of nine cases, and 170 ml in one  
209 case. One day after surgery, eight of nine patients reported pain levels below or equal 2 using a visual analog  
210 scale and were painless in the follow-up examinations. In the six patients with a complete robotic middle  
211 ear access, the electrode array was inserted through the drilled tunnel with an angular insertion depth of  
212  $501^\circ \pm 94^\circ$  (Table 2). In subject 1, plaque formation in the cochlear basal turn (Cogan syndrome) prevented  
213 insertion into the scala tympani and resulted in scala vestibuli placement as predicted in the preoperative  
214 planning [10]. Scala tympani insertion was reported in all other subjects. All patients were discharged from  
215 hospital one day after surgery.

216

217 **Figure 3.** (left) Patient prepared for intraoperative CBCT imaging. (right) Microscopic inspection of the  
 218 robotically drilled tunnel (arrow) after reversion to conventional procedure including a mastoidectomy  
 219 (subject 02).

220

221 **Table 2.** Summary of results. IM-d<sub>FN</sub> is the distance tunnel to facial nerve based on the intraoperative  
 222 imaging; ACC = effective drilling accuracy at the level of the facial recess; FD-d<sub>FN</sub> = estimated distance of  
 223 the drill tunnel to the facial nerve using force-density correlation; DEC = Confirmation for sufficient  
 224 geometric clearance; D<sub>ins</sub> = angular insertion depth; SV = scala vestibuli; ST = scala tympani.

225

| ID   | Plan                    | Robotic drilling phases |                             |             |                            |                                       |       | Implantation |       |       |                         |
|------|-------------------------|-------------------------|-----------------------------|-------------|----------------------------|---------------------------------------|-------|--------------|-------|-------|-------------------------|
|      | d <sub>FN</sub><br>(mm) | Drill                   | i                           |             |                            | ii                                    |       | iii          |       | Scala | D <sub>ins</sub><br>(°) |
|      |                         |                         | Geometric safety assessment |             |                            |                                       | Drill | EMG          | Drill |       |                         |
|      |                         |                         | IM-d <sub>FN</sub><br>(mm)  | ACC<br>(mm) | FD-d <sub>FN</sub><br>(mm) | DEC                                   |       |              |       |       |                         |
| 01   | 0.73                    | ✓                       | 0.90                        | 0.17        | 1.01                       | ✓                                     | ✓     | ✓            | ✓     | SV    | 360                     |
| 02   | 0.63                    | ✓                       | DYS <sup>1</sup>            | n.a.        | 0.12                       | Reverted to conventional <sup>1</sup> |       |              | ST    | 510   |                         |
| 03   | 0.62                    | ✓                       | 0.39                        | 0.23        | 0.35                       | ✓                                     | ✓     | ✓            | ✓     | ST    | 540                     |
| 04   | 0.54                    | ✓                       | 0.38                        | 0.16        | 0.38                       | ✓                                     | ✓     | ✓            | ✓     | ST    | 525                     |
| 05   | 0.72                    | ✓                       | 0.67                        | 0.05        | 0.78                       | ✓                                     | ✓     | ✓            | ✓     | ST    | 380                     |
| 06   | 0.65                    | ✓                       | 0.36                        | 0.29        | 1.18                       | ✓                                     | ✓     | ✓            | ✓     | ST    | 660                     |
| 07   | 0.50                    | ✓                       | 0.84                        | 0.34        | 0.80                       | ✓                                     | ✓     | ✓            | ✓     | ST    | 440                     |
| 08   | 0.51                    | ✓                       | 0.22                        | 0.29        | 0.16                       | Reverted to conventional <sup>2</sup> |       |              | ST    | 555   |                         |
| 09   | 0.49                    | ✓                       | 0.65                        | 0.16        | 1.45                       | Reverted to conventional <sup>3</sup> |       |              | ST    | 540   |                         |
| Mean | 0.60                    |                         | 0.55                        | 0.21        | 0.69                       |                                       |       |              |       |       | 501                     |
| (SD) | (0.09)                  |                         | (0.25)                      | (0.09)      | (0.47)                     |                                       |       |              |       |       | (94)                    |

226 <sup>1</sup> Scanner dysfunction and subsequent decision to revert due to non-available imaging

227 <sup>2</sup> Decision to revert due to critical distance to facial nerve (value 0.22 mm)

228 <sup>3</sup> Decision to revert due to critical distance to external auditory canal (value 0.19 mm)

229 **Duration**

230 The total average procedure duration (skin to skin) was 4:05 hours (min/max. 3:15/5:00 hours). The  
 231 averaged sub-procedural times were: screw insertion (13 min), patient transfer and preoperative CT imaging  
 232 (29 min), surgical planning (37 min), patient preparation (60 min, performed simultaneously with surgical  
 233 planning), patient registration (8 min), robotic drilling to the level of the facial recess (phase (i), 6 min),  
 234 intraoperative imaging and analysis (54 min), robotic drilling through the facial recess with intermittent  
 235 facial nerve stimulation and monitoring (phase (ii), 16 min), drilling to the middle ear cavity (phase (iii) (5  
 236 min), tympanomeatal flap (17 min), implant bed preparation (9 min), cochlear access (14 min), CI electrode  
 237 array insertion (6 min), and implant fixation and wound closure (8 min).

238

239 **Audiological Outcome**

240 Aided sound field hearing thresholds as well as aided word recognition for monosyllables and numbers  
 241 showed clear benefit after CI activation (Table 3). The average word recognition scores for numbers were  
 242 54% (N=9), 69% (N=9), 66% (N=5), and 72% (N=5), at 1, 3, 6 and 12 months after surgery, respectively.  
 243 The patients achieved monosyllabic word recognition scores of 23% (N=9), 39% (N=9), 50% (N=5), and  
 244 56% (N=5), respectively. In the patients with low frequency residual hearing, minimal to partial hearing  
 245 preservation after surgery was achieved (Table 3).

246

247 **Table 3.** Audiological outcomes.

| Subject | Word recognition<br>(numbers) <sup>†</sup> , % | Word recognition<br>(monosyllables) <sup>†</sup> , % | Aided sound field<br>PTA <sup>†</sup> , dB HL | Active<br>channels | Hearing preservation, %   |
|---------|------------------------------------------------|------------------------------------------------------|-----------------------------------------------|--------------------|---------------------------|
| 01      | 20/60/60/70                                    | 0/40/50/60                                           | 34/26/22/23                                   | 10                 | not assessed              |
| 02*     | 60/90/90/100                                   | 30/50/60/60                                          | 29/29/28/28                                   | 12                 | not assessed              |
| 03      | 20/20/40/30                                    | 0/0/10/50                                            | 38/39/39/39                                   | 12                 | 61 (partial preservation) |
| 04      | 10/55/60/80                                    | 20/50/70/60                                          | 38/34/35/34                                   | 10                 | 21 (minimal preservation) |
| 05      | 80/60/80/80                                    | 40/10/60/50                                          | 39/44/40/39                                   | 9                  | not assessed              |
| 06      | 100/100/-/-                                    | 30/80/-/-                                            | 38/35/-/-                                     | 12                 | 57 (partial preservation) |
| 07      | 100/100/-/-                                    | 60/60/-/-                                            | 34/35/-/-                                     | 11                 | 47 (partial preservation) |
| 08*     | 60/70/-/-                                      | 20/60/-/-                                            | 35/39/-/-                                     | 12                 | not assessed              |
| 09*     | 40/70/-/-                                      | 10/5/-/-                                             | 44/39/-/-                                     | 12                 | 39 (partial preservation) |

PTA = pure tone average over 0.5/1/2/4 kHz; <sup>†</sup>measured 1/3/6/12 months postoperatively; \*partially completed procedure.

248

## DISCUSSION

249  
250  
251  
252  
253  
254  
255  
256  
257  
258  
259  
260  
261  
262  
263  
264  
265  
266  
267  
268  
269  
270  
271  
272  
273  
274  
275  
276  
277  
278

Based on the criterion of sufficient width of the facial recess, 62% of screened patients (18 of 29) were eligible. This compares favorably with a previous estimate of 47% [24]. The feasibility of the surgeon driven, task-autonomous robotic drilling procedure was demonstrated in 6 of 9 patients. In 3 patients, the RCI workflow decision-making led the team to revert the procedure to a conventional CI. The study shows that micro-surgical robotic technology can be deployed in a clinically resilient manner and across varying patient anatomies to deliver geometrically-accurate keyhole, access to the inner ear. In subject 02, the workspace limitation of the intraoperative CB-CT scanner caused reversion to a conventional procedure, which can be avoided by employing pre-surgical anatomy assessments or alternative imaging technologies with greater imaging volumes. In subjects 08 and 09, the deviated drill tunnel (Table 2) led to critical proximity to the facial nerve and auditory canal wall and thus the procedures were reverted. Although these two subjects did not have a full, robotic drill path past the facial nerve, the procedures demonstrated the effectiveness of intraoperative imaging at the decision point 3 mm before being level with the facial nerve, as a key safety feature. The previously identified and validated drill geometry configuration and drill process parametrization [25] demonstrated feasibility and safety in all 9 subjects. In the six cases with a complete robotic middle ear access, the force density drill pose safety assessment corroborated the safe passage determined on intraoperative images. EMG based distance measurements made intermittently and while passing the facial recess were always conclusive with the imaging-based tool-to-nerve distance assessments and resulted in safe continuation of the robotic drilling procedure [12]. In all implanted patients, both the clinical and electrophysiological facial nerve function remained intact compared to baseline measurements. Time required for intraoperative imaging confirmation of sufficient instrument-to-nerve distance was 54 mins. Nonetheless, workflow optimization and complete intraoperative integration of imaging and image analysis technology (both for planning and confirmation) into the workflow and routine OR work will lead to significant time and cost reductions. During this trial an auxiliary access was required for three reasons: (i) drilling of the cochlear access, in our case by removal of the bony overhang, (ii) as backup access in case of bleeding or unanticipated problems during array insertion, and (iii) sealing of the cochlear access after insertion completion. To facilitate the lifting of the tympanomeatal flap, an L-shaped retroauricular incision was replaced by a C-shaped incision after the first case. In future, optimized electrode array designs and robotically performed inner ear access and electrode array insertion may remove the need for this secondary

279 access. Although, not being an endpoint of this trial, we demonstrated that hearing preservation can be  
280 achieved with the RCI procedure. Audiological outcomes compare favorably to conventional cochlear  
281 implantation [26,27], however further study is required.

282

283 The presented work introduces task-autonomous surgical robotics to the field of otological microsurgery  
284 (autonomy level 2) [28]. Robotic technology offers possibilities to overcome human operator limitations to  
285 provide for reproducible, minimally invasive cochlear access and ultimately a deliberate and accurate  
286 electrode insertion process, potentially widening CI patient eligibility in the future. We consider the work  
287 presented as a first step towards this goal and believe to have demonstrated feasibility of the overall approach  
288 in a sufficient variety of patient anatomies and workflow iterations. Interestingly, a robotic keyhole access  
289 renders direct visual supervision of the actual drilling process impossible. Hence, safety elements such as  
290 EMG-based facial nerve monitoring and intraoperative imaging were utilized to confirm correct drill  
291 alignment. To ensure safety of the robotic access and to demonstrate the efficacy of the applied safety  
292 measures, independent clinical trials with larger patient numbers need to be performed. Compared to  
293 conventional cochlear implantation, the presented approach is more time-consuming and labor-intensive.  
294 As with all novel surgical techniques, an increased average duration of the surgery owing to learning curve  
295 and the execution of safety procedures is to be expected throughout the first cases. Most prominently and  
296 because of the underlying technological complexity, every step in the workflow was carefully co-checked,  
297 monitored and confirmed by the multi-disciplinary team, resulting in a reduced overall workflow efficiency.  
298 In addition, preoperative high-resolution CT scans were conducted outside the OR (resulting in patient  
299 preparation and transportation) prolonging the overall procedure time. Additionally, time was required for  
300 intraoperative imaging together with the necessary image data transfer, peer assessment and subsequent  
301 decision making. Further integration of intraoperative imaging devices will drastically reduce the time  
302 needed for pre- and intraoperative imaging and image processing. To introduce a complete robotic cochlear  
303 implantation approach, we are currently developing and investigating solutions for robotic inner ear access,  
304 robotic electrode insertion, multi-port scenarios [29], narrower drills (i.e. 1mm to 1.4 mm) with integrated  
305 monitoring electrodes and ultimately robotics compliant CI implant technology.

306

307

308

309

## ACKNOWLEDGMENTS

310 The authors thank Dr. Simona Negoias, Dr. Cilgia Dür, and Gianni Pauciello, Department of ENT, Head  
311 and Neck Surgery, and Dr. Stefan Henle, Department of Anesthesiology and Pain Medicine, Inselspital,  
312 Bern University Hospital, University of Bern, Bern, Switzerland for their contributions to the study. The  
313 authors acknowledge financial and in-kind contributions made possible by MED-EL GmbH (Innsbruck  
314 Austria), CAScination AG (Bern Switzerland) and Xoran Technologies (Ann Arbor, USA).

315

## REFERENCES

316  
317  
318  
319  
320  
321  
322  
323  
324  
325  
326  
327  
328  
329  
330  
331  
332  
333  
334  
335  
336  
337  
338  
339  
340  
341  
342  
343  
344

1. House WF. Cochlear implants. *Ann Otol Rhinol Laryngol*. 85, S1-93 (1976).
2. Müller J. [Bilateral cochlear implants]. In German. *HNO*. 65, 561-570 (2017).
3. Crowson MG, Semenov YR, Tucci DL, Niparko JK. Quality of Life and Cost-Effectiveness of Cochlear Implants: A Narrative Review. *Audiol Neurootol*. 22, 236-258 (2017).
4. Roland JT, Gantz BJ, Waltzman SB, Parkinson AJ. Long-term outcomes of cochlear implantation in patients with high-frequency hearing loss. *Laryngoscope*. 128, 1939-1945 (2018).
5. Marchioni D, Grammatica A, Alicandri-Ciufelli M, Genovese E, Presutti L. Endoscopic cochlear implant procedure. *Eur Arch Otorhinolaryngol*. 271, 959-966 (2014).
6. Häusler R. Cochlear implantation without mastoidectomy: the pericanal electrode insertion technique. *Acta Otolaryngol*. 122, 715-719 (2002).
7. Migirov L, Dagan E, Kronenberg J. Suprameatal approach for cochlear implantation in children: our experience with 320 cases. *Cochlear Implants Int*. 11, S195-198 (2010).
8. Kiratzidis T, Iliades T, Arnold W. Veria Operation. II. Surgical results from 101 cases. *ORL J Otorhinolaryngol Relat Spec*. 64, 413-416 (2002).
9. Labadie RF, Balachandran R, Noble JH, Blachon GS, Mitchell JE, Reda FA, et al. Minimally invasive image-guided cochlear implantation surgery: first report of clinical implementation. *Laryngoscope*. 124, 1915-1922 (2014).
10. Caversaccio M, Gavaghan K, Wimmer W, Williamson T, Ansò J, Mantokoudis G, et al. Robotic cochlear implantation: surgical procedure and first clinical experience. *Acta Otolaryngol*. 137, 447-454 (2017).
11. Ross BG, Fradet G, Nedzelski JM. Development of a sensitive clinical facial grading system. *Otolaryngol Head Neck Surg*. 114, 380-386 (1996).
12. Ansó J, Scheidegger O, Wimmer W, Gavaghan K, Gerber N, Schneider D, et al. Neuromonitoring during Robotic Cochlear Implantation: Initial Clinical Experience. *Ann Biomed Eng*. 46, 1568-1581 (2018).
13. Gerber N, Gavaghan KA, Bell BJ, Williamson TM, Weisstanner C, Caversaccio MD, et al. High-Accuracy Patient-to-Image Registration for the Facilitation of Image-Guided Robotic Microsurgery on the Head. *IEEE Trans Biomed Eng*. 60, 960-968 (2013).

- 345 14. Gerber N, Bell B, Gavaghan K, Weisstanner C, Caversaccio M, Weber S. Surgical planning tool for  
346 robotically assisted hearing aid implantation. *Int J Comput Assist Radiol Surg.* 9, 11-20 (2014).
- 347 15. Wimmer W, Venail F, Williamson T, Akkari M, Gerber N, Weber S, et al. Semiautomatic  
348 cochleostomy target and insertion trajectory planning for minimally invasive cochlear implantation.  
349 *Biomed Res Int.* 596498; 10.1155/2014/596498. (2014).
- 350 16. Weber S, Gavaghan K, Wimmer W, Williamson T, Gerber N, Anso J, et al. Instrument flight to the  
351 inner ear. *Sci Robot.* 2:eaa4916; 10.1126/scirobotics.aal4916 (2017).
- 352 17. Bell B, Gerber N, Williamson T, Gavaghan K, Wimmer W, Caversaccio M, et al. In vitro accuracy  
353 evaluation of image-guided robot system for direct cochlear access. *Otol Neurotol.* 34, 1284-1290  
354 (2013).
- 355 18. Rathgeb C, Wagner F, Wimmer W, Gerber N, Williamson T, Anschutz L. The Accuracy of Image  
356 Based Safety Analysis for Robotic Cochlear Implantation. *International Journal of Computer Assisted  
357 Radiology and Surgery.* *Int J Comput Assist Radiol Surg.* in print; 10.1007/s11548-018-1834-3 (2018)
- 358 19. Williamson T, Bell B, Gerber N, Salas L, Zysset P, Caversaccio M, et al. Estimation of Tool Pose  
359 Based on Force–Density Correlation During Robotic Drilling. *IEEE Trans Biomed Eng.* 60, 969-976  
360 (2013).
- 361 20. Ansó J, Dür C, Gavaghan K, Rohrbach H, Gerber N, Williamson T, et al. A Neuromonitoring Approach  
362 to Facial Nerve Preservation During Image-guided Robotic Cochlear Implantation. *Otol Neurotol.* 37,  
363 89-98 (2016).
- 364 21. Wimmer W, Bell B, Huth ME, Weisstanner C, Gerber N, Kompis M, et al. Cone beam and micro-  
365 computed tomography validation of manual array insertion for minimally invasive cochlear  
366 implantation. *Audiol Neurootol.* 19, 22-30 (2014).
- 367 22. Anshuetz L, Weder S, Mantokoudis G, Kompis M, Caversaccio M, Wimmer W. Cochlear Implant  
368 Insertion Depth Prediction: A Temporal Bone Accuracy Study. *Otol Neurotol.* 39, e996-e1001 (2018).
- 369 23. Skarzynski H, van de Heyning P, Agrawal S, Arauz SL, Atlas M, Baumgartner W, et al. Towards a  
370 consensus on a hearing preservation classification system. *Acta Otolaryngol.* 564, S3-13 (2013).
- 371 24. Williamson T, Gavaghan K, Gerber N, Weder S, Anshuetz L, Wagner F, et al. Population Statistics  
372 Approach for Safety Assessment in Robotic Cochlear Implantation. *Otol Neurotol.* 38, 759-764 (2017).



- 373 25. Feldmann A, Anso J, Bell B, Williamson T, Gavaghan K, Gerber N, et al. Temperature Prediction  
374 Model for Bone Drilling Based on Density Distribution and In Vivo Experiments for Minimally  
375 Invasive Robotic Cochlear Implantation. *Ann Biomed Eng.* 44, 1576-1586 (2016).
- 376 26. Zeh R, Baumann U. [Inpatient rehabilitation of adult CI users: Results in dependency of duration of  
377 deafness, CI experience and age]. *HNO.* 63, 557-576 (2015).
- 378 27. Brand Y, Senn P, Kompis M, Dillier N, Allum JH. Cochlear implantation in children and adults in  
379 Switzerland. *Swiss Med Wkly.* 144:w13909; 10.4414/smw.2014.13909 (2014).
- 380 28. Yang GZ, Cambias J, Cleary K, Daimler E, Drake J, Dupontet PE, al. Medical robotics—Regulatory,  
381 ethical, and legal considerations for increasing levels of autonomy. *Sci Robot.* 2:eaal4916; doi:  
382 10.1126/scirobotics.aal4916 (2017).
- 383 29. Stenin I, et al. Minimally invasive, multi-port approach to the lateral skull base: a first in vitro  
384 evaluation. *Int J Comput Assist Radiol Surg.* 12, 889-895 (2017).

## Enrollment

Assessed for eligibility (n=43)

Excluded (n=34)

- Insufficient facial recess width (n=11)
- Declined to participate (n=9)
- Other inclusion criteria (n=14)

## Allocation

Allocated for intervention (n=9)  
Not allocated for intervention (n=0)

## Follow-Up

Robotic cochlear implantation (n=6)  
Conventional cochlear implantation (n=3)  
Lost to follow up (n=0)

## Analysis

Analyzed (n=9)  
Excluded from analysis (n=0)

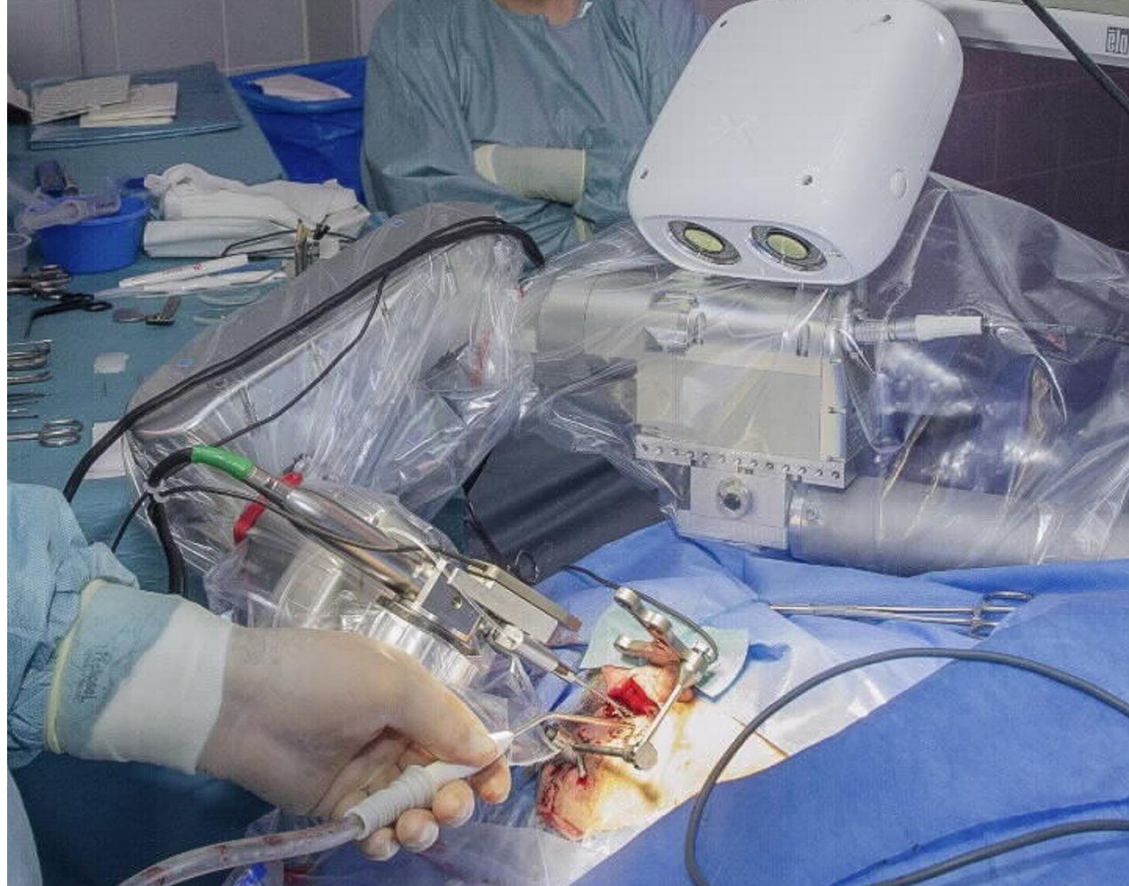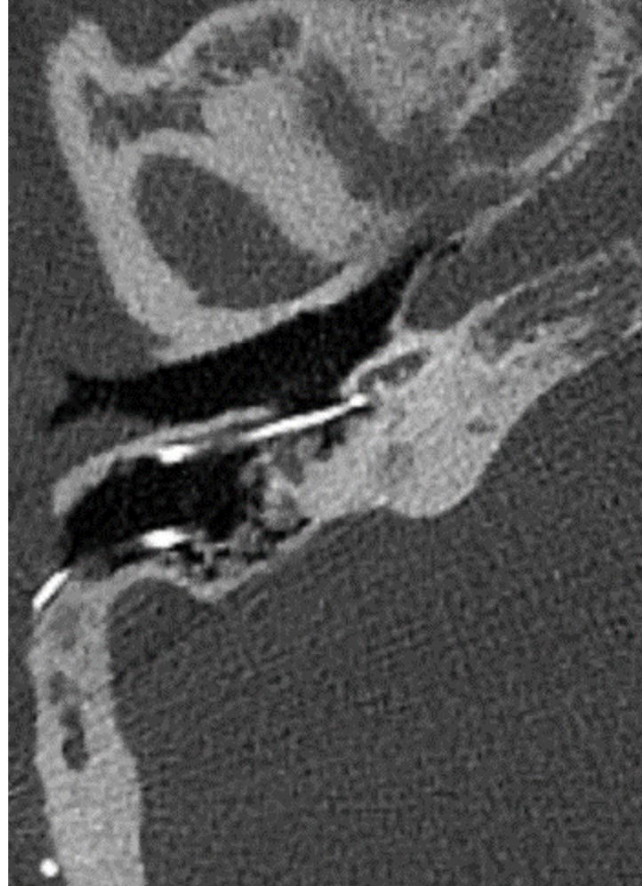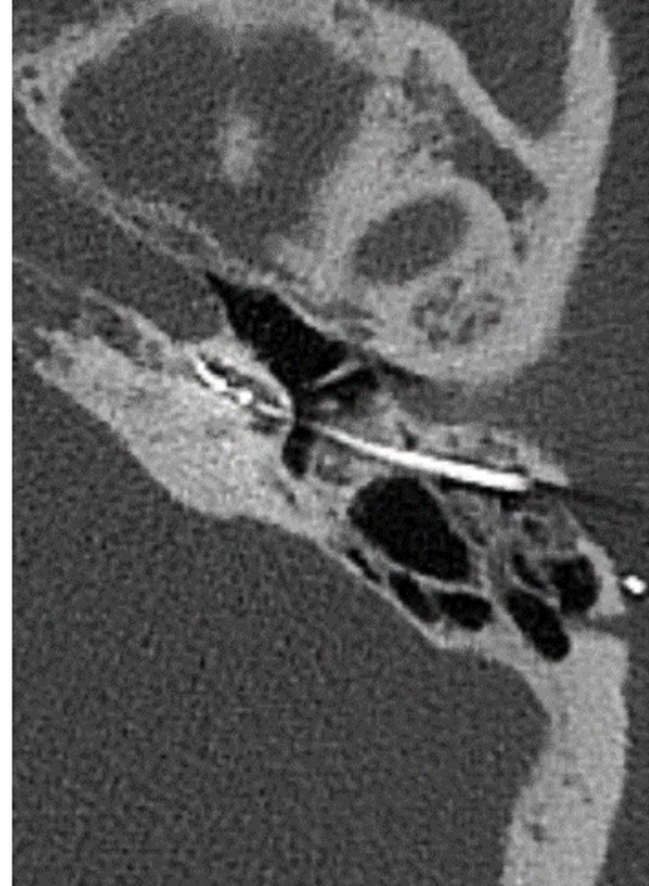

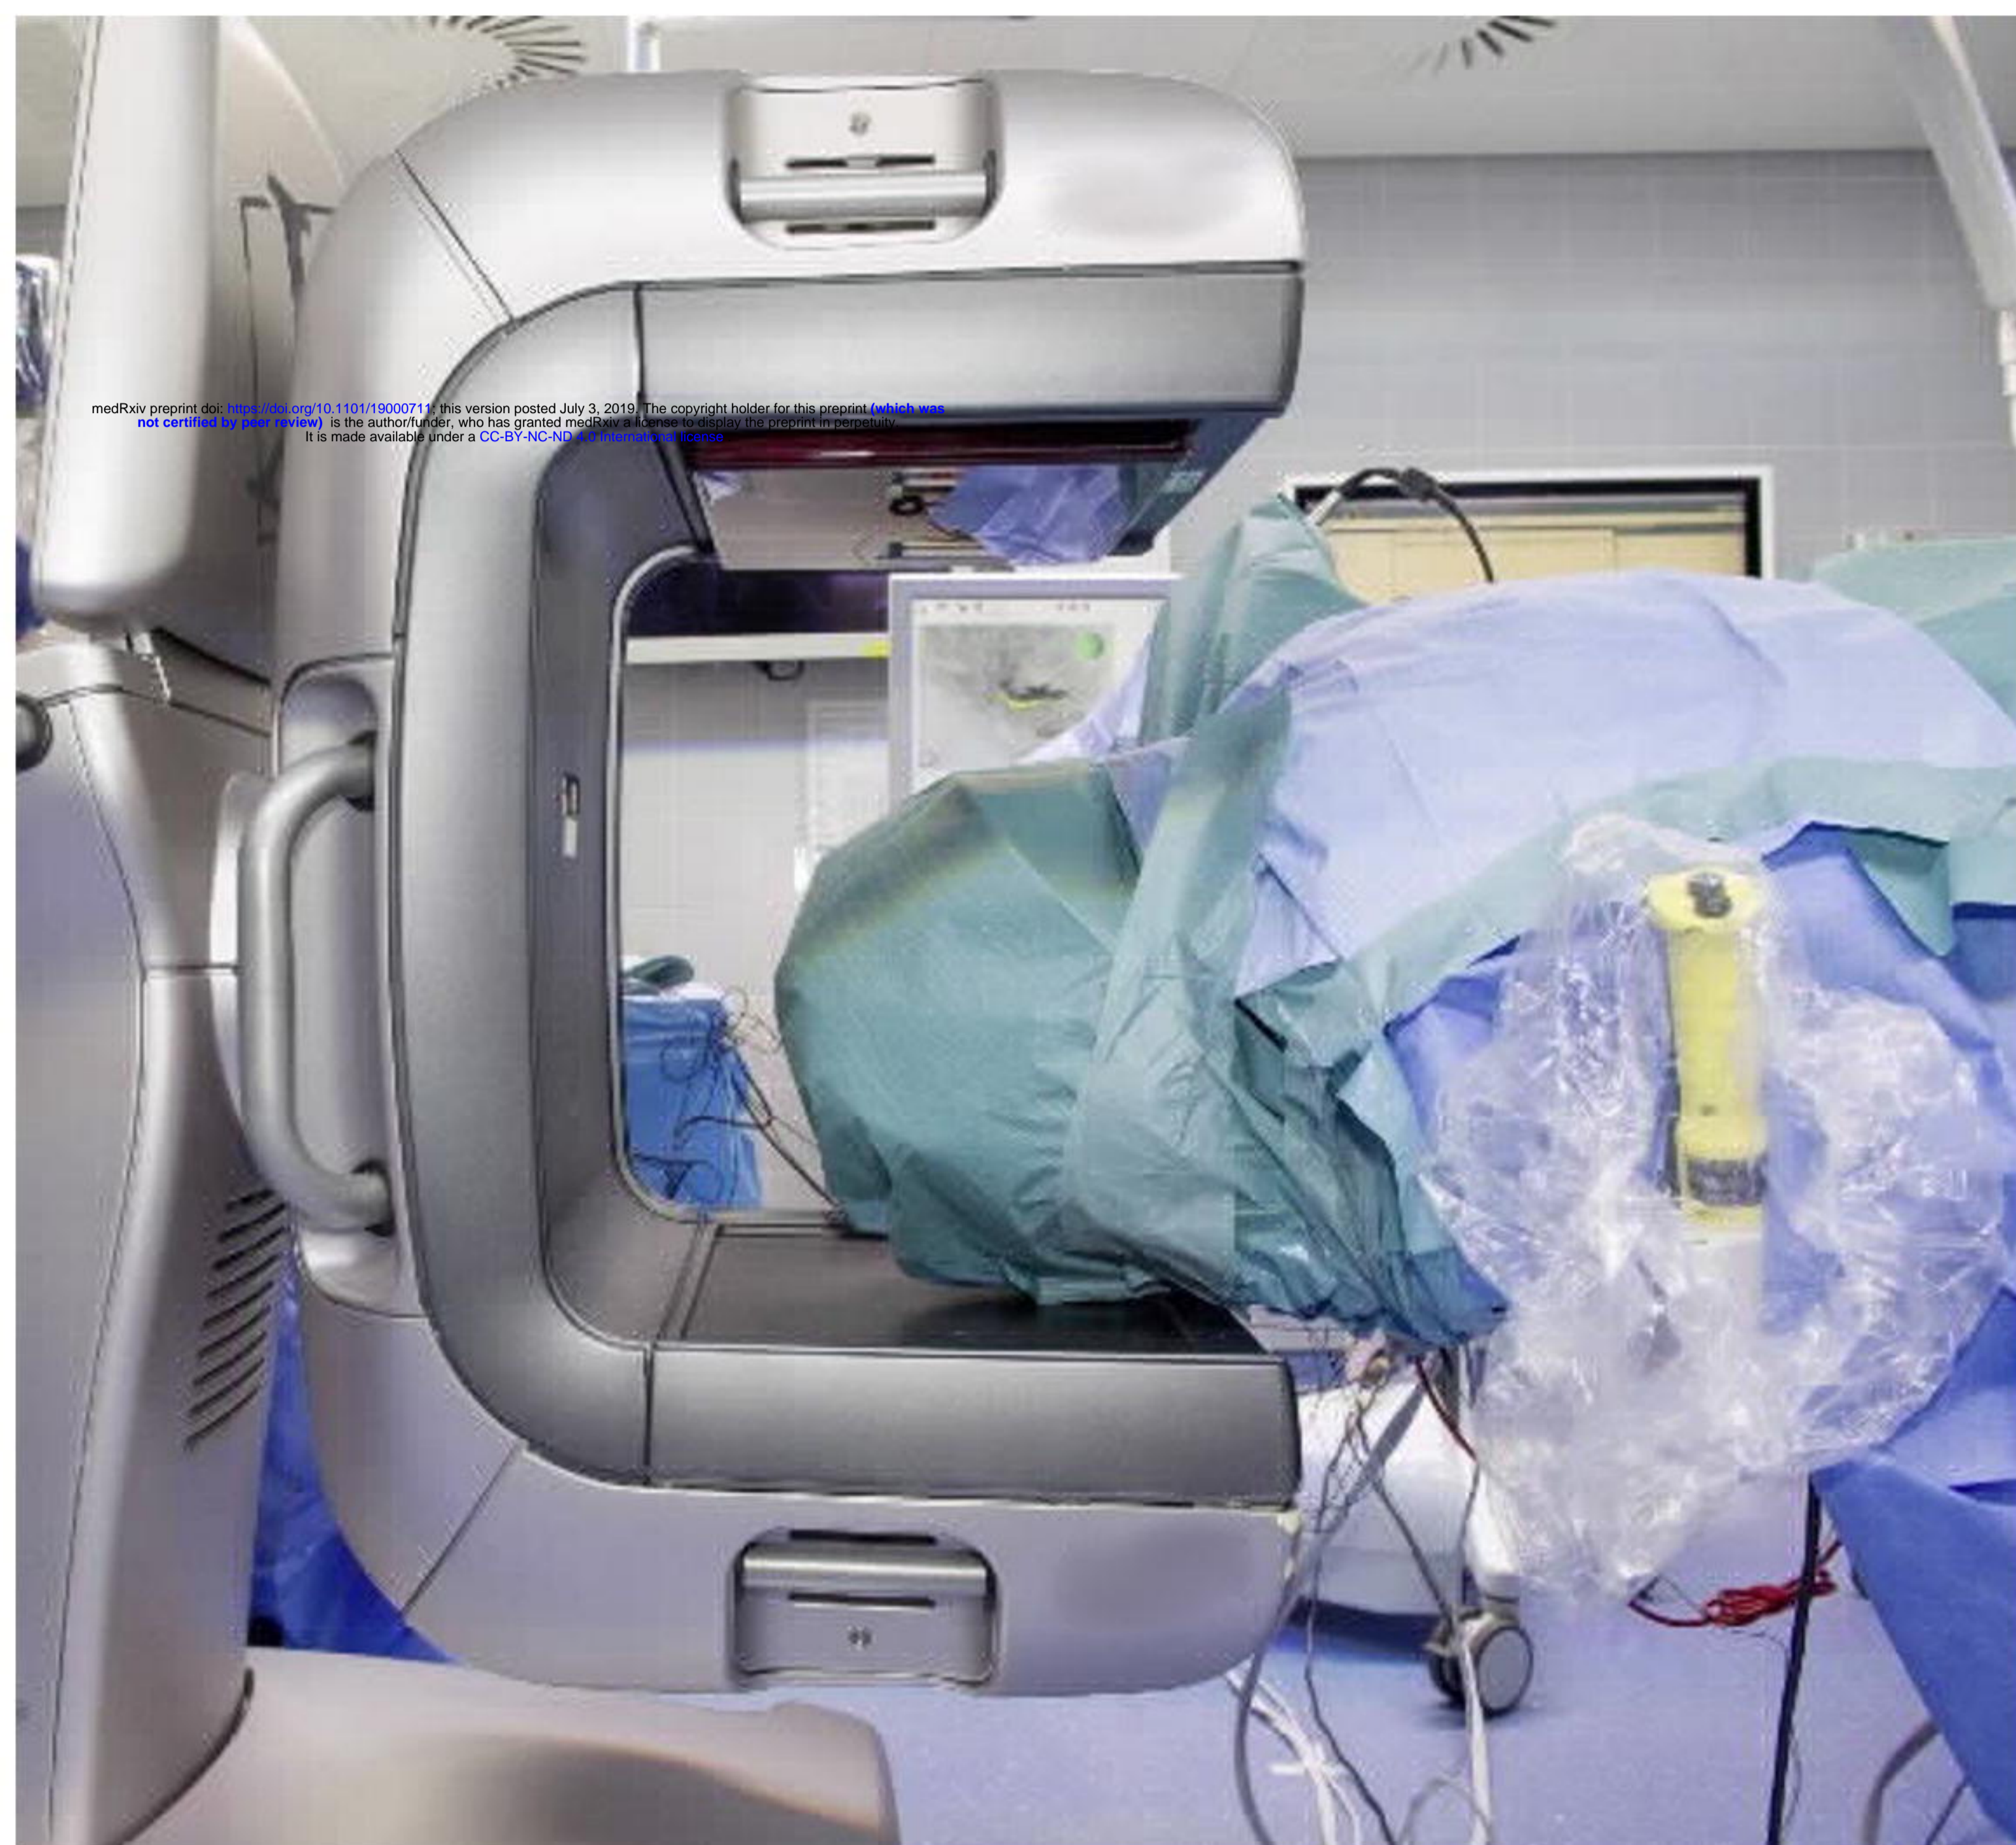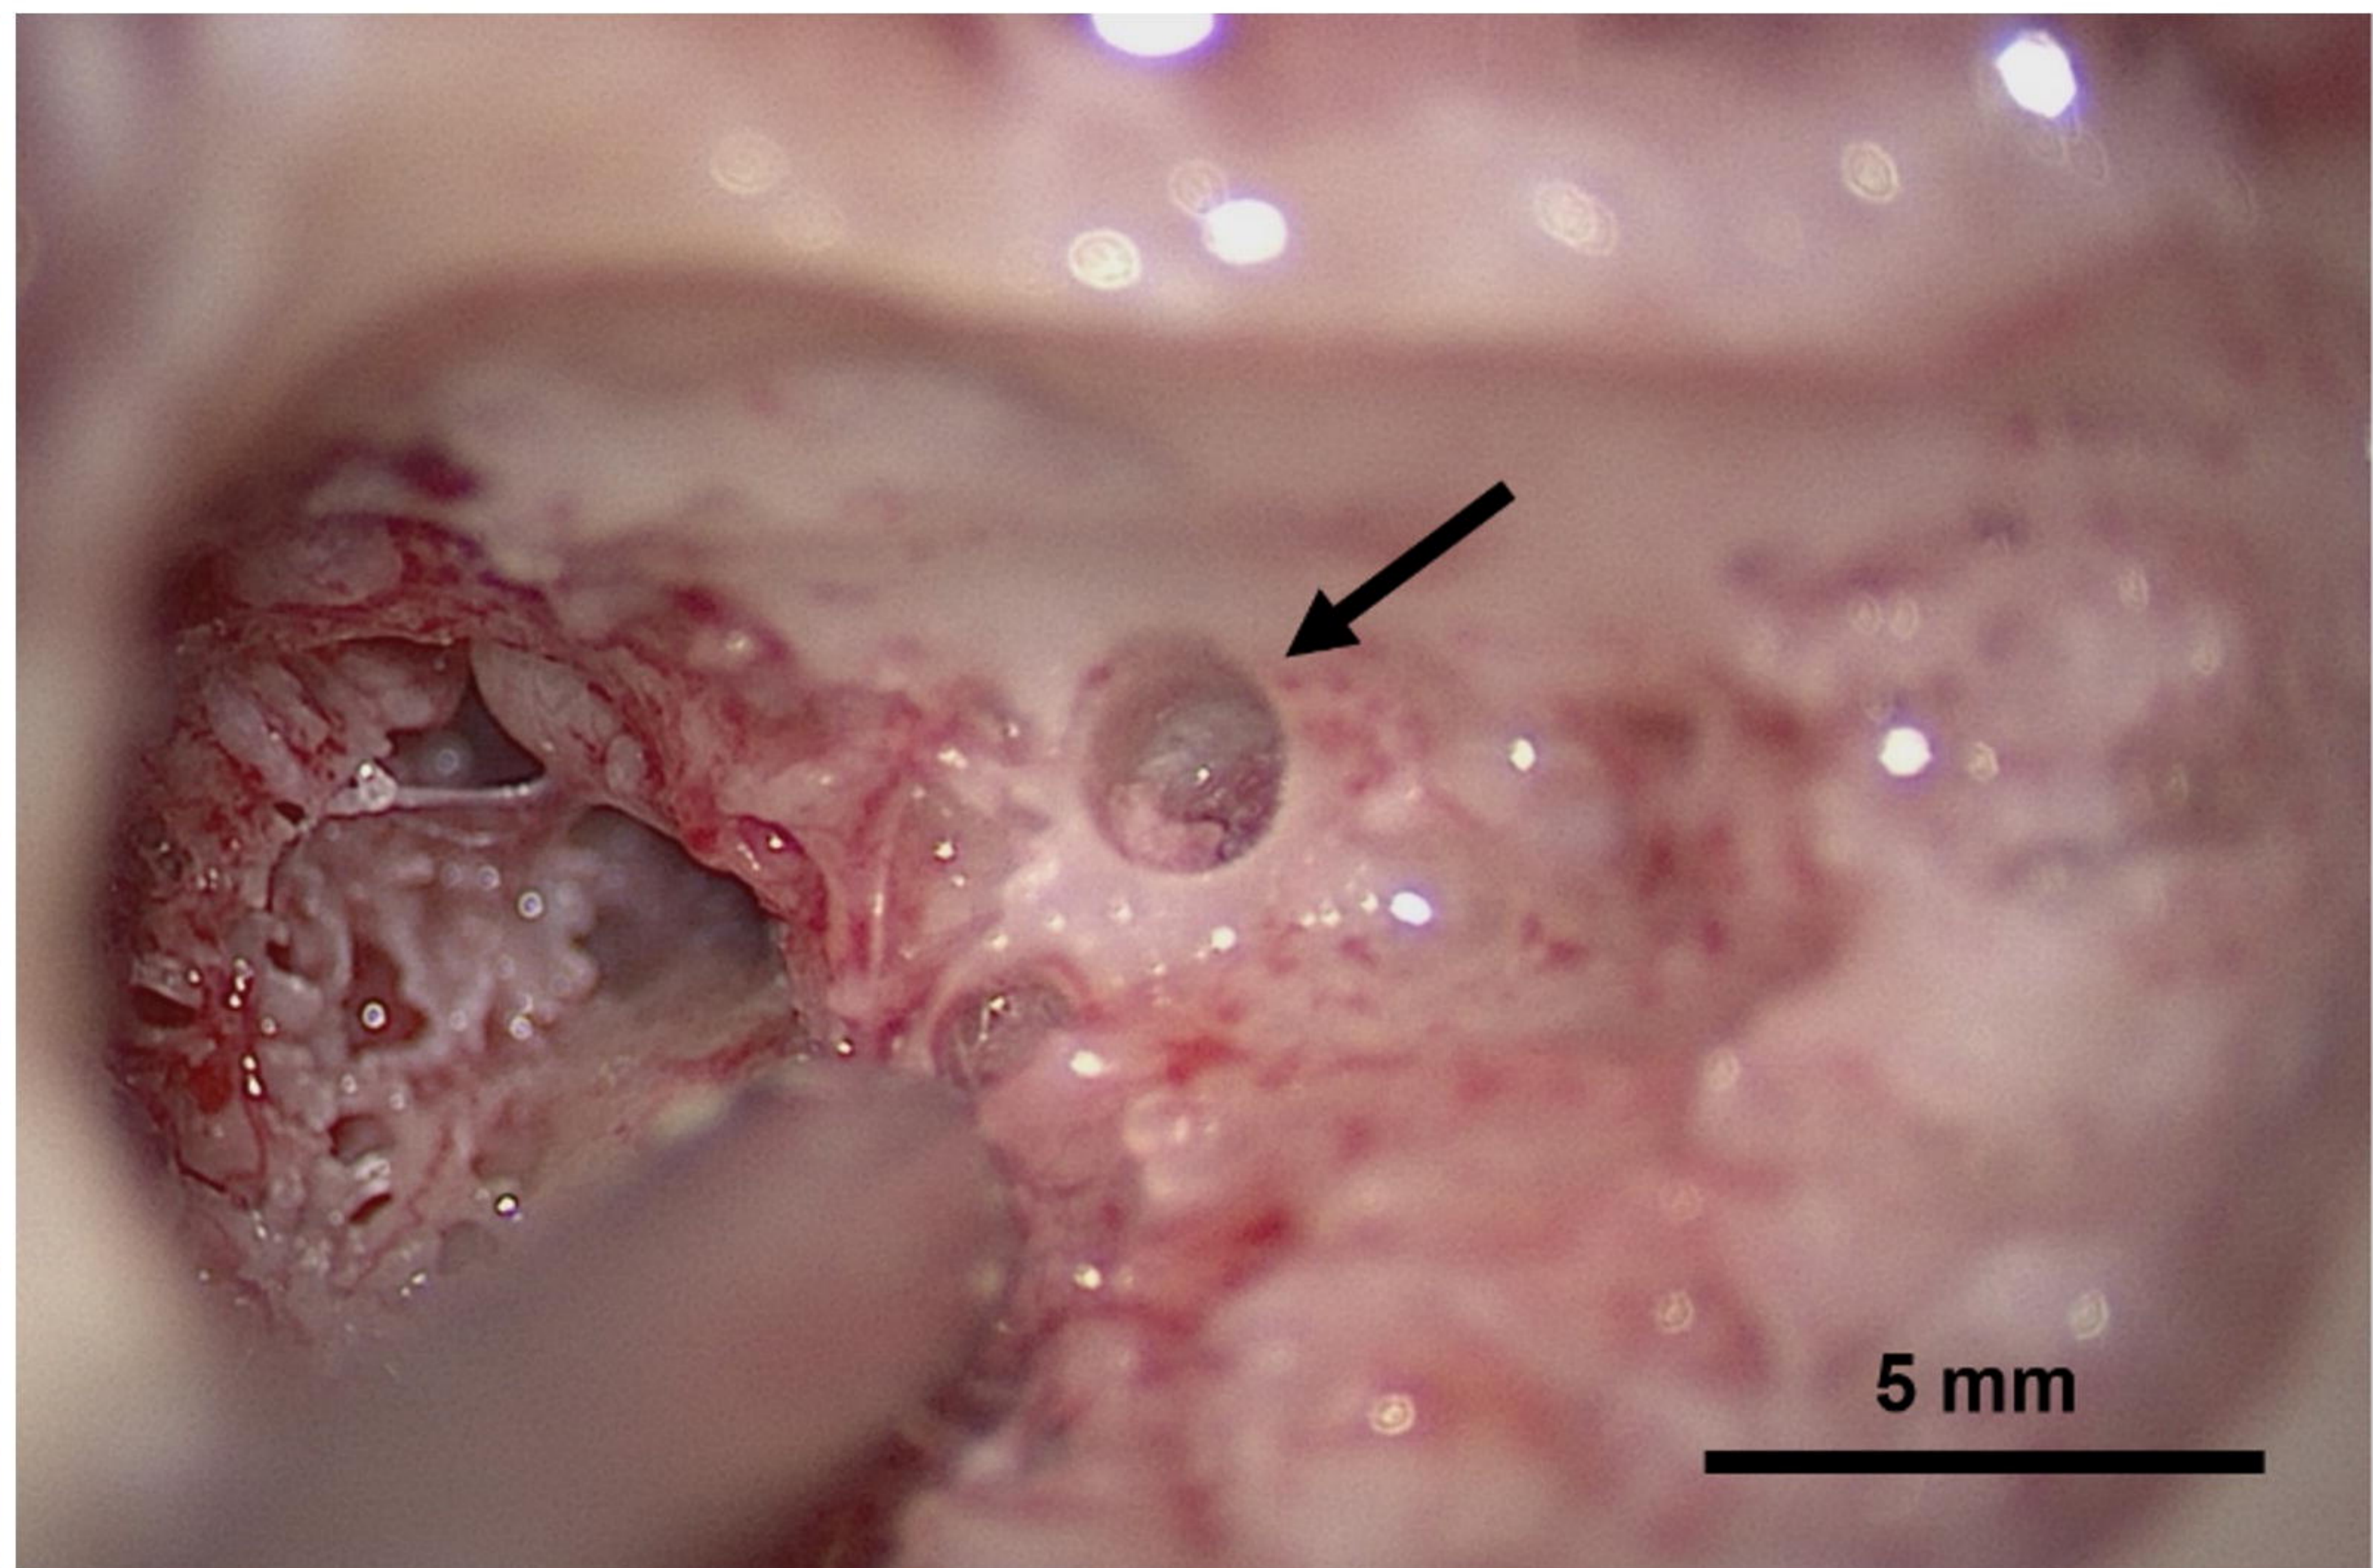

Source: https://medrxiv.org/content/medrxiv/early/2019/07/03/19000711.full.pdf
